# Supplementary material for: Robust reconstitution of active cell-cycle control complexes from co-expressed proteins in bacteria
Source: PubMed Central journal article supplement (PMC3490756; doi:10.1186/1746-4811-8-23), 2012-06-28
Supplement: 1746-4811-8-23-S2.pdf [file 1746-4811-8-23-S2.pdf]

**Supplementary Table 1. Vector properties**

| <b>Vector</b> | <b>Gene 1</b>    | <b>Gene 2</b> | <b>Cloning sites<br/>(Gene1)</b>  | <b>Cloning sites<br/>(Gene2)</b> | <b>Replicon</b> | <b>Antibiotic<br/>resistance</b> |
|---------------|------------------|---------------|-----------------------------------|----------------------------------|-----------------|----------------------------------|
| pHMGWA        | HisMBP-SDS       | -             | Gateway                           | -                                | ColE1           | Ampicillin                       |
|               | HisMBP-CYCB1;2   | -             | Gateway                           | -                                | ColE1           | Ampicillin                       |
| pHGGWA        | HisGST-CYCD3;1   | -             | Gateway                           | -                                | ColE1           | Ampicillin                       |
|               | HisGST-Wee1      | -             | Gateway                           | -                                | ColE1           | Ampicillin                       |
|               | HisGST-CDKF;1    | -             | Gateway                           | -                                | ColE1           | Ampicillin                       |
| pCDFDuet-1    | StrepIII-CDKA;1  | GST-Cak1      | <i>NcoI</i> - <i>NotI</i>         | <i>NdeI</i> - <i>XhoI</i>        | CloDF13         | Spectinomycin                    |
|               | StrepIII-CDKB1;1 | GST-Cak1      | <i>NcoI</i> - <i>NotI</i>         | <i>NdeI</i> - <i>XhoI</i>        | CloDF13         | Spectinomycin                    |
|               | StrepIII-CDKB2;2 | GST-Cak1      | <i>NcoI</i> - <i>NotI</i> (SLIC†) | <i>NdeI</i> - <i>XhoI</i>        | CloDF13         | Spectinomycin                    |
|               | -                | GST-Cak1      | -                                 | <i>NdeI</i> - <i>XhoI</i>        | CloDF13         | Spectinomycin                    |
|               | StrepIII-CDKA;1  | -             | <i>NcoI</i> - <i>NotI</i>         | -                                | CloDF13         | Spectinomycin                    |
|               | -                | GST-CDKF;1    | -                                 | <i>NdeI</i> - <i>XhoI</i>        | CloDF13         | Spectinomycin                    |
|               | StrepIII-CDKA;1  | GST-CDKF;1    | <i>NcoI</i> - <i>NotI</i>         | <i>NdeI</i> - <i>XhoI</i>        | CloDF13         | Spectinomycin                    |

†Sequence and ligation-independent cloning
